# Supplementary material
Source: PubMed Central journal article supplement (PMC7269789)
Supplement: ajcr0010-1455-f6.pdf [file ajcr0010-1455-f6.pdf]

## BAP1 stabilizes DIDO1

**Supplementary Table 1.** Sequences for siRNAs and primers used for qRT-PCR

| Sequences for siRNAs  |                                 |                                 |
|-----------------------|---------------------------------|---------------------------------|
| Gene                  | Sequence                        |                                 |
| si-BAP1#1             | 5'-CGUCCGUGAUUGAUGAUGAdTdT-3'   |                                 |
| si-BAP1#2             | 5'-CCAACUCUUGUGCAACUCAdTdT-3'   |                                 |
| si-DIDO1              | 5'-GCACAAGAGACUAGCGUCAGAGAAA-3' |                                 |
| si-Control            | 5'-ACAGACUUCGGAGUACCGdTdT-3'    |                                 |
| Sequences for primers |                                 |                                 |
| Gene                  | RT Forward                      | RT Reverse                      |
| BAP1                  | 5'-AGGAGCTGCTGGCACTGCTGA-3'     | 5'-TTGTGGAGCCGGCCGATGCT-3'      |
| DIDO1                 | 5'-TTCCATCCAACTCTTGCCTTT-3'     | 5'-CCAAGAATTATATTCGGACGTGGTG-3' |

**Supplementary Table 2.** Antibody list

| Antibody epitope  | Mono/polyclonal | Host   | Source         | Catalog No. | Application     |
|-------------------|-----------------|--------|----------------|-------------|-----------------|
| BAP1              | Monoclonal      | Rabbit | Cell Signaling | D7W70       | WB, IP          |
| BAP1              | Monoclonal      | Mouse  | Santa Cruz     | sc-28383    | IHC             |
| DIDO1             | Monoclonal      | Mouse  | Santa Cruz     | sc-25264    | WB, IP, IF, IHC |
| $\alpha$ -tubulin | Monoclonal      | Mouse  | Sigma          | T5168       | IF              |
| $\gamma$ -tubulin | Monoclonal      | Rabbit | Abcam          | ab179503    | IF              |
| ubiquitin         | Monoclonal      | Rabbit | Epitomics      | 6652-1      | WB              |
| Myc               | Polyclonal      | Rabbit | MBL            | 562         | WB              |
| HA                | Monoclonal      | Mouse  | MBL            | M180-3      | WB, IF          |
| FLAG              | Monoclonal      | Mouse  | Sigma          | F1804       | WB              |
| Actin             | Monoclonal      | Mouse  | Sigma          | A2228       | WB              |

IF: immunofluorescence; IP: immunoprecipitation; IHC: immunohistochemistry; WB: Western blotting.

**Supplementary Table 3.** Patient characteristics and clinicopathological factors by ARRDC3 and YAP1 expression

|                    | BAP1 neg | BAP1 pos | <i>p</i> value | DIDO1 neg | DIDO1 pos | <i>p</i> value |
|--------------------|----------|----------|----------------|-----------|-----------|----------------|
| No. of patients    | 4        | 30       |                | 6         | 28        |                |
| Median age (years) | 58.5     | 53.2     |                | 59.4      | 5         |                |
| Sex                |          |          | 0.649          |           |           | 0.891          |
| Male               | 3        | 23       |                | 5         | 22        |                |
| Female             | 1        | 7        |                | 1         | 6         |                |
| Fuhrman grade      |          |          | 0.048          |           |           | 0.001          |
| Low (G1/G2)        | 1        | 24       |                | 1         | 23        |                |
| High (G3/G4)       | 3        | 6        |                | 5         | 5         |                |
| Primary T stage    |          |          | 0.003          |           |           | 0.01           |
| Low (pT1/pT2)      | 1        | 25       |                | 2         | 25        |                |
| High (pT3/pT4)     | 3        | 5        |                | 4         | 3         |                |
